# Supplementary material for: Supercoiling of an excised genomic island represses effector gene expression to prevent activation of host resistance
Source: PubMed Central journal article supplement (PMC6220960; doi:10.1111/mmi.14111), 2018-10-03
Supplement: MMI-110-444-s001.pdf [file MMI-110-444-s001.pdf]

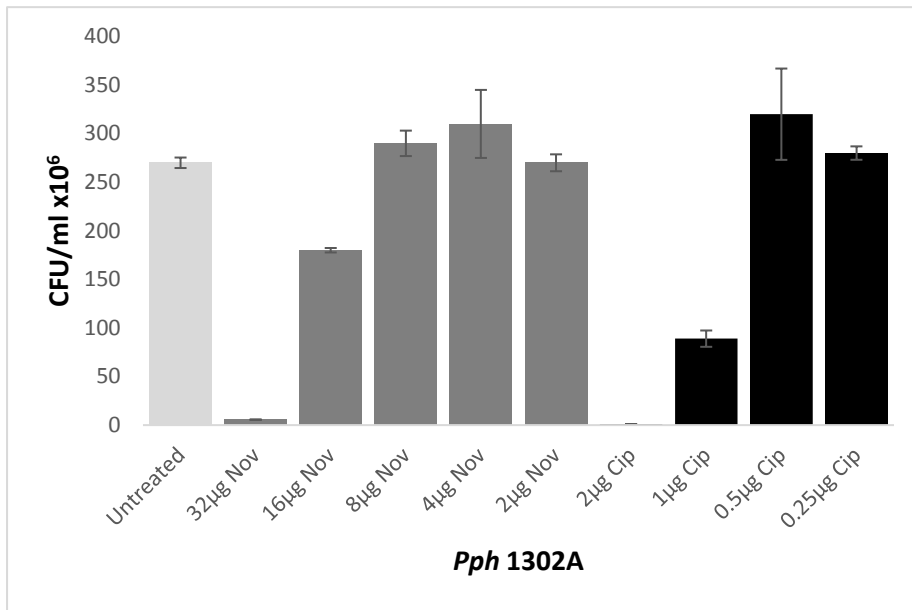

**Fig. S1.**
